# Supplementary material for: Polyoxometalates function as indirect activators of a G protein-coupled receptor
Source: Royal Society of Chemistry journal article supplement (doi:10.1039/d0mt00044b), 2020-05-18
Supplement: d0mt00044b1.pdf [file d0mt00044b1.pdf]

## SUPPLEMENTARY INFORMATION

### Polyoxometalates Function as Indirect Activators of a G Protein-Coupled Receptor

**Duaa Althumairy<sup>a,b</sup>, Kahoana Postal<sup>c,d</sup>, B. George Barisas<sup>a,c</sup>, Giovana G. Nunes<sup>d</sup>, Deborah A. Roess<sup>a,e\*</sup>, and Debbie C. Crans<sup>a,c\*</sup>**

<sup>a</sup> Cell and Molecular Biology Program, Colorado State University Fort Collins, CO 80523, United States of America

<sup>b</sup> Department of Biological Sciences, King Faisal University, Saudi Arabia

<sup>c</sup> Department of Chemistry, Colorado State University Fort Collins, CO 80523, United States of America

<sup>d</sup> Department of Chemistry, Universidade Federal do Paraná, Curitiba, Paraná, 81.531-980

<sup>e</sup> Department of Biomedical Sciences, Colorado State University Fort Collins, CO 80523, United States of America

\*Corresponding Author: e-mail: [Debbie.Crans@colostate.edu](mailto:Debbie.Crans@colostate.edu)

#### Summary

**Fig. S1** The <sup>51</sup>V NMR spectra (left) and EPR (right) of 1.0 mmol L<sup>-1</sup> aqueous solution of **V<sub>1</sub>** with pH adjusted to 7.4 is shown as a function of time for 34 h. The signals with  $\delta$  in ppm are assigned to **V<sub>1</sub>** = H<sub>2</sub>VO<sub>4</sub><sup>-</sup> (-554), **V<sub>2</sub>** = H<sub>2</sub>V<sub>2</sub>O<sub>7</sub><sup>2-</sup> (-570), and **V<sub>4</sub>** = V<sub>4</sub>O<sub>12</sub><sup>4-</sup> (-575 ppm). .....3

**Fig. S2** The <sup>51</sup>V NMR spectra (left) and EPR (right) of 1.0 mmol L<sup>-1</sup> aqueous solution of **V<sub>10</sub>** with pH adjusted to 7.4 is shown as a function of time for 34 h. The signals with  $\delta$  in ppm are assigned to **V<sub>1</sub>** = H<sub>2</sub>VO<sub>4</sub><sup>-</sup> (-557), **V<sub>2</sub>** = H<sub>2</sub>V<sub>2</sub>O<sub>7</sub><sup>2-</sup> (-571), **V<sub>4</sub>** = V<sub>4</sub>O<sub>12</sub><sup>4-</sup> (-575), and **V<sub>10</sub>** = HV<sub>10</sub>O<sub>28</sub><sup>5-</sup> (-422, -497 and -512 ppm). .....3

**Fig. S3** The <sup>51</sup>V NMR spectra (left) and EPR (right) of 1.0 mmol L<sup>-1</sup> aqueous solution of **V<sub>14</sub>** with pH adjusted to 7.4 is shown as a function of time for 34 h. The signals with  $\delta$  in ppm are assigned to **V<sub>1</sub>** = H<sub>2</sub>VO<sub>4</sub><sup>-</sup> (-558), **V<sub>2</sub>** = H<sub>2</sub>V<sub>2</sub>O<sub>7</sub><sup>2-</sup> (-571), **V<sub>4</sub>** = V<sub>4</sub>O<sub>12</sub><sup>4-</sup> (-575), **V<sub>10</sub>** = HV<sub>10</sub>O<sub>28</sub><sup>5-</sup> (-423, -498 and -514) and **V<sup>V</sup><sub>14</sub>** = H<sub>4</sub>V<sub>14</sub>O<sub>42</sub>P<sup>5-</sup> (-517, -566, and -584 ppm). .....4

**Fig. S4** The <sup>51</sup>V NMR spectra (left) and EPR (right) of 1.0 mmol L<sup>-1</sup> aqueous solution of **V<sub>15</sub>** with pH adjusted to 7.4 is shown as a function of time for 34 h. The signals with  $\delta$  in ppm are assigned to **V<sub>1</sub>** = H<sub>2</sub>VO<sub>4</sub><sup>-</sup> (-558), **V<sub>2</sub>** = H<sub>2</sub>V<sub>2</sub>O<sub>7</sub><sup>2-</sup> (-571), **V<sub>4</sub>** = V<sub>4</sub>O<sub>12</sub><sup>4-</sup> (-576) and **V<sub>5</sub>** = V<sub>5</sub>O<sub>15</sub><sup>5-</sup> (-584 ppm). .....4

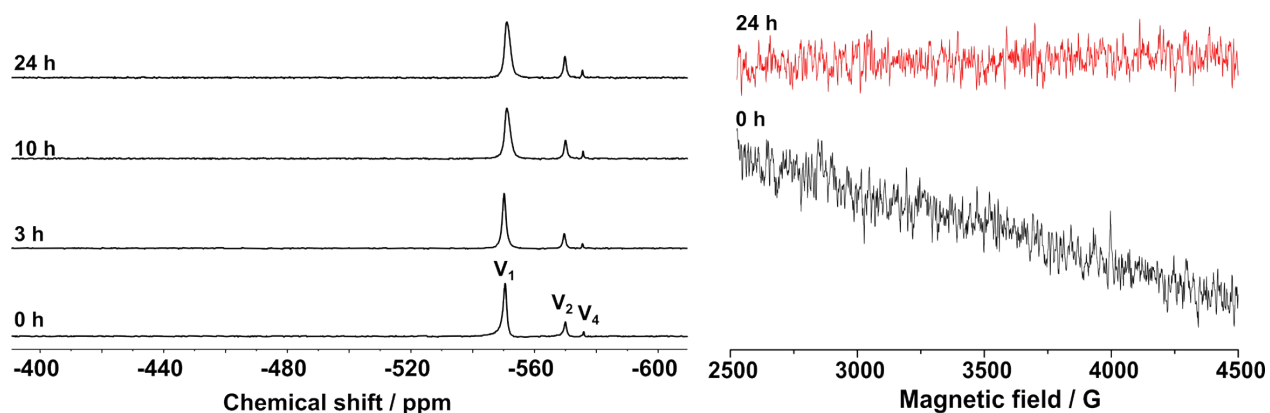

**Fig. S1** The  $^{51}\text{V}$  NMR spectra (left) and EPR (right) of 1.0 mmol L $^{-1}$  aqueous solution, pH 7.4, of  $\text{V}_1$  is shown as a function of time for 34 h. The signals with  $\delta$  in ppm are assigned to  $\text{V}_1 = \text{H}_2\text{VO}_4^-$  (-554),  $\text{V}_2 = \text{H}_2\text{V}_2\text{O}_7^{2-}$  (-570), and  $\text{V}_4 = \text{V}_4\text{O}_{12}^{4-}$  (-575 ppm).

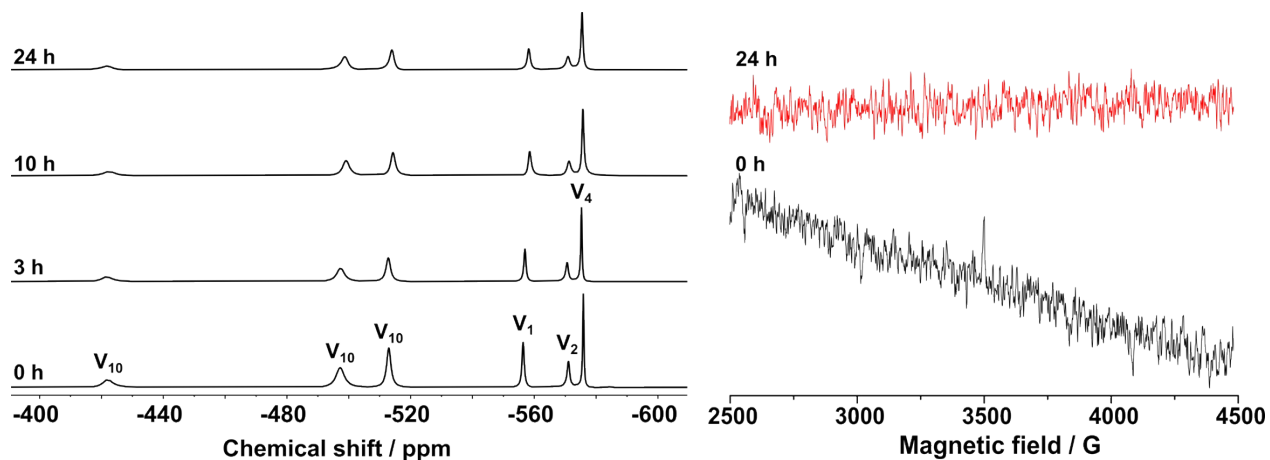

**Fig. S2** The  $^{51}\text{V}$  NMR spectra (left) and EPR (right) of 1.0 mmol L $^{-1}$  aqueous solution, pH 7.4, of  $\text{V}_{10}$  is shown as a function of time for 34 h. The signals with  $\delta$  in ppm are assigned to  $\text{V}_1 = \text{H}_2\text{VO}_4^-$  (-557),  $\text{V}_2 = \text{H}_2\text{V}_2\text{O}_7^{2-}$  (-571),  $\text{V}_4 = \text{V}_4\text{O}_{12}^{4-}$  (-575), and  $\text{V}_{10} = \text{HV}_{10}\text{O}_{28}^{5-}$  (-422, -497 and -512 ppm).

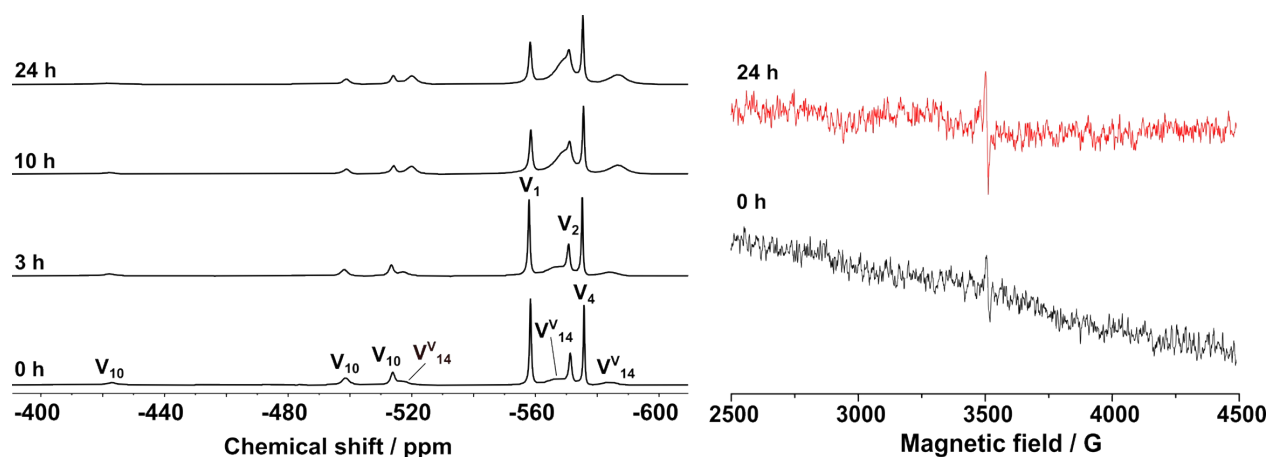

**Fig. S3** The  $^{51}\text{V}$  NMR spectra (left) and EPR (right) of 1.0 mmol L $^{-1}$  aqueous solution, pH 7.4, of  $\text{V}_{14}$  is shown as a function of time for 34 h. The signals with  $\delta$  in ppm are assigned to  $\text{V}_1 = \text{H}_2\text{VO}_4^-$  (-558),  $\text{V}_2 = \text{H}_2\text{V}_2\text{O}_7^{2-}$  (-571),  $\text{V}_4 = \text{V}_4\text{O}_{12}^{4-}$  (-575),  $\text{V}_{10} = \text{HV}_{10}\text{O}_{28}^{5-}$  (-423, -498 and -514) and  $\text{V}_{14}^{\text{V}} = \text{H}_4\text{V}_{14}\text{O}_{42}\text{P}^{5-}$  (-517, -566, and -584 ppm).

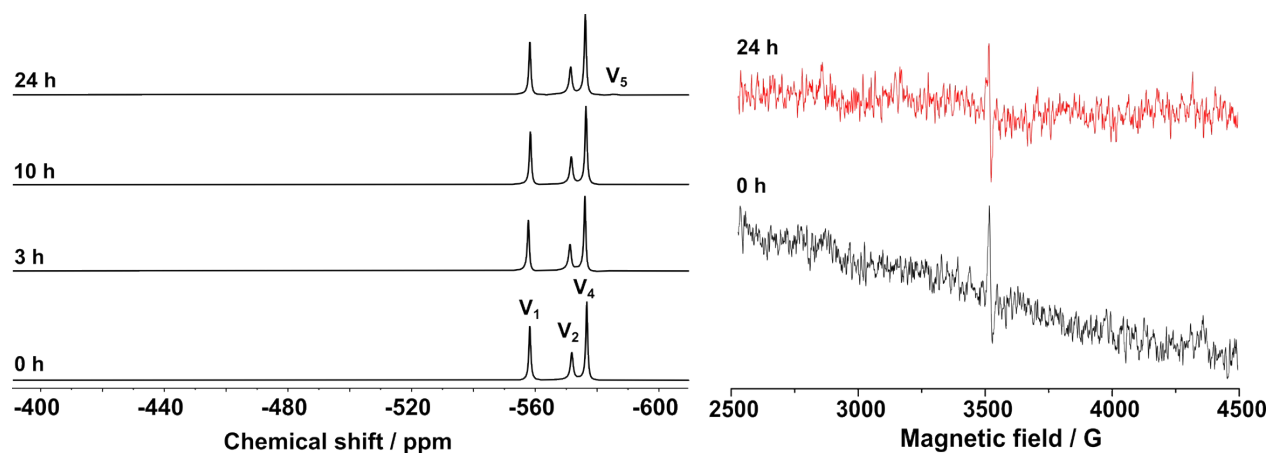

**Fig. S4** The  $^{51}\text{V}$  NMR spectra (left) and EPR (right) of 1.0 mmol L $^{-1}$  aqueous solution, pH 7.4, of  $\text{V}_{15}$  is shown as a function of time for 34 h. The signals with  $\delta$  in ppm are assigned to  $\text{V}_1 = \text{H}_2\text{VO}_4^-$  (-558),  $\text{V}_2 = \text{H}_2\text{V}_2\text{O}_7^{2-}$  (-571),  $\text{V}_4 = \text{V}_4\text{O}_{12}^{4-}$  (-576) and  $\text{V}_5 = \text{V}_5\text{O}_{15}^{5-}$  (-584 ppm).
